1 ***In vitro* reduction of *Plasmodium falciparum* gametocytes by *Artemisia spp.* tea infusions**

2  
3 Danielle Snider, Pamela J. Weathers\*

4 Department of Biology and Biotechnology, Worcester Polytechnic Institute, Worcester,  
5 MA 01609 USA  
6

7  
8  
9 **\*Corresponding author:**

10 Prof. Pamela J. Weathers  
11 Biology & Biotechnology  
12 Worcester Polytechnic Institute,  
13 100 Institute Rd  
14 Worcester, MA 01609  
15 USA  
16 Email: [weathers@wpi.edu](mailto:weathers@wpi.edu)  
17 Phone: 508-831-5196  
18  
19

20 **Abstract**

21 In this study, we showed *in vitro* evidence that supports the efficacy of *A. annua* and *A. afra* tea  
22 infusions used in a 2015 clinical trial not only for clearing asexual *Plasmodium falciparum*  
23 parasites, but also for eliminating sexual gametocytes. *P. falciparum* NF54 was grown *in vitro*,  
24 synchronized, and induced to form gametocytes using N-acetylglucosamine. Cultures during  
25 asexual, early, and late stage gametogenesis were treated with artemisinin, methylene blue, and  
26 *Artemisia annua* and *A. afra* tea infusions (5g DW/L) using cultivars that contained 0-283 µM  
27 artemisinin. Asexual parasitemia and gametocytemia were analyzed microscopically.  
28 Gametocyte morphology was also scored. Markers of early (*PfGEXP5*) and late stage (*Pfs25*)  
29 gametocyte gene expression were also measured using RT-qPCR. Both *A. annua* and *A. afra* tea  
30 infusions reduced gametocytemia *in vitro*, and the effect was mainly artemisinin dependent.  
31 Expression levels of both marker genes were reduced with the effect mainly attributed to  
32 artemisinin content of the our tested *Artemisia* cultivars. Tea infusions of both species also  
33 inhibited asexual parasitemia and although mainly artemisinin dependent, there was a weak  
34 antiparasitic effect from artemisinin-deficient *A. afra*. These results showed that *A. annua* and to  
35 a lesser extent, *A. afra*, inhibited parasitemia and gametogenesis *in vitro*, and results are  
36 consistent with earlier observed clinical results.  
37  
38

39 **Introduction**

40 Malaria is a severe global health problem that disproportionately affects Africans and especially  
41 children under age 5. In 2018, there were 228 million cases of malaria worldwide, and 93%  
42 occurred in Africa (World Health Organization, 2019). The plant *Artemisia annua* L. has been  
43 used for > 2,000 years to treat fever, a characteristic of malaria. Artemisinin is the antimalarial

44 sesquiterpene lactone isolated from the glandular trichomes of this plant. Artemisinin has poor  
45 solubility and low bioavailability, so it is no longer clinically used. Instead, it has been replaced  
46 with one of four semisynthetic derivatives used in combination with a partner drug to form  
47 artemisinin-combination therapies (ACTs), the current frontline global antimalarials (Gomes *et*  
48 *al.*, 2016). To achieve eradication of malaria, therapies must not only eliminate patient  
49 infections, but also prevent parasite transmission (The malERA Consultative Group on Drugs,  
50 2011).

51  
52 When the malaria parasite, *Plasmodium falciparum*, enters the human body via a mosquito bite,  
53 it first undergoes asexual development, followed later by its sexual stage (Phillips *et al.*, 2017).  
54 The asexual stage causes the severe clinical symptoms of the disease and, if left untreated, can  
55 result in death. The sexual stage, gametocytes, do not contribute to patient mortality, but rather  
56 are responsible for parasite transmission back to the mosquito to complete the full life cycle of  
57 the parasite (Phillips *et al.*, 2017). Gametocytes are also crucial therapeutic targets, because by  
58 eliminating them, the cycle of malaria can be broken.

59  
60 Few currently used antimalarials are effective at eliminating both stages of the parasite. Most  
61 antimalarials target metabolically active parasite stages (Delves *et al.*, 2013). As gametocytes  
62 mature, however, their overall metabolic activity declines until they reach quiescence at maturity  
63 (Young *et al.*, 2005). While some antimalarials, including artemisinin derivatives, chloroquine,  
64 quinine, and atovaquone, have some activity against early stage gametocytes, only primaquine is  
65 clinically approved to kill late stage gametocytes (Baker, 2010; Duffy and Avery, 2013; Beri *et*  
66 *al.*, 2018). Primaquine, however, has some serious adverse effects, so safer gametocyte-targeted  
67 therapeutics are desirable (Sanofi-Aventis, 2017).

68  
69 In 2015, a clinical trial compared the efficacy of a standard ACT, artesunate-amodiaquine  
70 (ASAQ), against tea infusions of *A. annua* and its cousin *Artemisia afra* (Munyangi *et al.* 2019).  
71 Not only did both *Artemisia* infusions eliminate asexual-stage parasites more effectively than  
72 ASAQ (88.8% for *A. afra*, 96.4% for *A. annua*, vs. 34.3% for ASAQ at day 28), but both tea  
73 infusions were also more effective in clearing microscopically measured gametocytes from the  
74 bloodstream (100% for both teas vs. 98% for ASAQ by day 14) (Munyangi *et al.*, 2019).

75  
76 Based on those clinical results, it is important to better understand the gametocytocidal effects of  
77 the two *Artemisia* species by comparing how each tea infusion treatment affects gametocytes at  
78 different stages of their maturation. Gametocytes are significantly under-estimated when only  
79 measured microscopically, so qPCR analysis of developmental stage markers is important to  
80 establish the efficacy of any anti-gametocyte therapeutic (Bousema *et al.*, 2006). Here we used  
81 RT-qPCR to track the early and late stage markers, *PfGEXP5* and *Pfs25*, respectively, to further  
82 measure the efficacy of *Artemisia spp.* tea infusions *in vitro* against NF54 *P. falciparum*  
83 gametocytes.

84  
85 **Materials and Methods**

86

## 87 **Plant material and its preparation for testing**

88 *Artemisia annua* L. cv. SAM (voucher MASS 317314) and *A. afra* Jacq. ex Willd. (SEN,  
89 voucher LG0019529; PAR, voucher LG0019528; LUX, voucher MNHNL2014/172) tea  
90 infusions were all prepared from dried plant material (leaves and small twigs) steeped in boiling  
91 water for 10 minutes to create a final concentration of 5 g/L. After cooling, the infusion was then  
92 successively filtered as follows: 1 mm sieve, 600  $\mu\text{m}$  sieve, Whatman #1 filter paper, Millipore  
93 RW03 pre-filter, 0.45  $\mu\text{m}$  type HA filter, and last a 0.22  $\mu\text{m}$  filter to sterilize. Sterile infusion  
94 was aliquoted into 1.5 mL tubes and stored at  $-80^{\circ}\text{C}$ . Artemisinin content of the filtered infusions  
95 was determined by gas chromatography mass spectroscopy (GCMS) as detailed in Martini et al.  
96 2020 (Martini *et al.*, 2020). SAM *A. annua* and SEN *A. afra* tea infusions contained 283 and 0.69  
97  $\mu\text{M}$  artemisinin, respectively; *A. afra* PAR and LUX contained no detectable artemisinin. For *A.*  
98 *annua* tea infusion, an appropriate volume for the experimental design was added to the culture  
99 to yield a final artemisinin concentration of 7.78  $\mu\text{M}$ . The same volume of the *A. afra* tea  
100 infusions was added to parasite cultures so that equivalent amounts of dry plant material were  
101 delivered for each infusion. This amounted to a 0.019  $\mu\text{M}$  dose of artemisinin for SEN *A. afra*  
102 tea infusions, and undetectable artemisinin content in PAR and LUX *A. afra* tea infusions.

## 103 ***Plasmodium falciparum* in vitro culture**

104 NF54 *P. falciparum* asexual parasites (gift of Dr. Ashley Vaughan, Seattle Children's Research  
105 Institute) were maintained using standard conditions: a  $37^{\circ}\text{C}$  incubator at 5%  $\text{O}_2$  and 5%  $\text{CO}_2$   
106 and maintained at 4% hematocrit using type A human erythrocytes (Red Cross) in complete  
107 media (CM: RPMI-1640 media supplemented with HEPES, D-glucose, hypoxanthine,  
108 gentamicin, sodium bicarbonate, and 10% type AB heat-inactivated human serum) (Moll *et al.*,  
109 2013). Cultures were fed with daily media changes and diluted to 1% parasitemia every other  
110 day with fresh erythrocytes.

111

## 112 **Parasite synchronization and gametocyte formation protocol**

113 Once asexual parasite cultures achieved 1% parasitemia or higher, they were synchronized for  
114 use in drug exposure assays. Working stock cultures were layered atop 70% Percoll columns  
115 (Percoll diluted in 10x RPMI, 13.3% sorbitol, and 1x PBS) and centrifuged at 2,500 x g for 10  
116 min with no brake to yield a column with 4 distinct bands. The top two bands (media and  
117 infected erythrocytes) were removed from the column. Infected erythrocytes were washed with  
118 repeated cycles of adding incomplete media (ICM) (RPMI-1640 media supplemented with  
119 HEPES, D-glucose, hypoxanthine, gentamicin, and sodium bicarbonate), centrifugation, and  
120 removal of culture media. Synchronized erythrocytes were resuspended in CM to 2% or 4%  
121 hematocrit as dictated by the experimental design. To yield a gametocyte-rich culture for use in  
122 the various assays, we adapted a synchronization method from section 3.2 of Saliba and Jacobs-  
123 Lorena (Saliba and Jacobs-Lorena, 2013) and instead performed the above Percoll  
124 synchronization. After Percoll synchronization, culture medium was changed daily, erythrocytes  
125 were not replenished, and parasitemia was monitored by Giemsa stain. Once the culture reached  
126 6-10% parasitemia, the CM was replaced by CM supplemented with 50 mM N-  
127 acetylglucosamine (NAG). NAG was used to eliminate asexual parasites and ensure an enriched  
128 gametocyte culture for testing. Daily medium changes were done with NAG-supplemented CM  
129 (NAG-CM) anywhere from 3-10 d depending on experimental design.

130

### 131 **Experimental design for drug exposure**

132 For the asexual parasite drug exposure time course (Figure 1A), an asexual feeder culture was  
133 maintained using SCM. Cultures were synchronized using the aforementioned Percoll method  
134 and then the synchronized infected erythrocytes were split evenly into the appropriate number of  
135 T12.5 flasks as dictated by each experiment. Fresh erythrocytes, CM, and drug solution were  
136 added into each flask for a final hematocrit of 2%. Cultures were incubated in their respective  
137 drug treatments for 48 hr at standard conditions. For the early stage gametocyte drug exposure  
138 time course (Figure 1B), an asexual feeder culture was maintained according to SCM. Once  
139 asexual parasitemia reached at least 1%, the culture was Percoll synchronized and gametocyte  
140 formation was NAG induced. Cultures were treated with NAG-CM for 3 d after reaching the 6-  
141 10% parasitemia threshold. Prior to drug treatment, early stage gametocytes were washed with  
142 ICM, suspended in CM, and equal volumes of the suspension were aliquoted evenly into as  
143 many flasks as needed for the experimental design. Flasks were treated with drug and  
144 resuspended to 2% hematocrit. Cultures were incubated for 48 hr in standard culturing  
145 conditions. For the late stage gametocyte drug exposure time course (Figure 1C), the same  
146 protocol was followed as described for the early stage gametocyte assay, except cultures were  
147 maintained in NAG-CM for 12 d post-induction rather than 3 days post-induction. Artemisinin  
148 controls were prepared to a final concentration of 7.78  $\mu\text{M}$  (high) or 0.019  $\mu\text{M}$  (low) in  
149 0.00275% DMSO. Methylene blue (MB) was prepared in water at a final concentration of 10  
150  $\mu\text{M}$ .

151

### 152 **Microscopy analysis and morphology assessment**

153 Thin-film smears were fixed in 100% methanol and Giemsa stained and counted using standard  
154 protocols (Moll *et al.*, 2013). Asexual parasitemia was determined and categorized as rings,  
155 trophozoites, or schizonts (Moll *et al.*, 2013). For absolute gametocyte counts, a 0.5 cm x 0.5 cm  
156 square was drawn on a thin-film Giemsa-stained smear and gametocytes were counted under  
157 1000x magnification in that marked region. Erythrocytes were also counted in order to quantify  
158 gametocytemia. Each gametocyte was imaged and qualitatively assessed for morphological  
159 damage in order to score gametocyte ‘health’. ‘Healthy’ gametocytes had smooth, intact edges,  
160 a robust appearance, and possessed hemozoin crystals stained darker than the rest of the cell.  
161 ‘Unhealthy’ gametocytes had a sickly appearance characterized by a variety of cell membrane  
162 deformities (see examples shown above Table 2).

163

### 164 **RT-qPCR analysis of gametocyte-specific genes**

165 Culture samples for RNA analysis were preserved using *RNAlater* (Invitrogen) and stored at -  
166 20C until extraction. For extraction, *RNAlater* reagent was removed, and then buffer ATL,  
167 Proteinase K, and buffer AL were added in that order from a QIAGEN QIAamp DNA mini kit.  
168 Samples were then processed using QIAGEN RNeasy mini kit, with the addition  $\beta$ -  
169 mercaptoethanol to RLT buffer and on-column DNA digestion using the QIAGEN RNase-free  
170 DNase kit. RNA was eluted in RNase-free water and stored at -80°C until use. cDNA was  
171 synthesized using QIAGEN QuantiTect Reverse Transcription kit using gene-specific primers  
172 (Table 1) and stored at -20°C until use. RT-qPCR reaction was performed in a Roche Lightcycler

173 using FastStart Essential DNA Probes Master mix (Roche) and gene specific primer/probe sets  
174 (Table 1) with ASL as the reference gene.

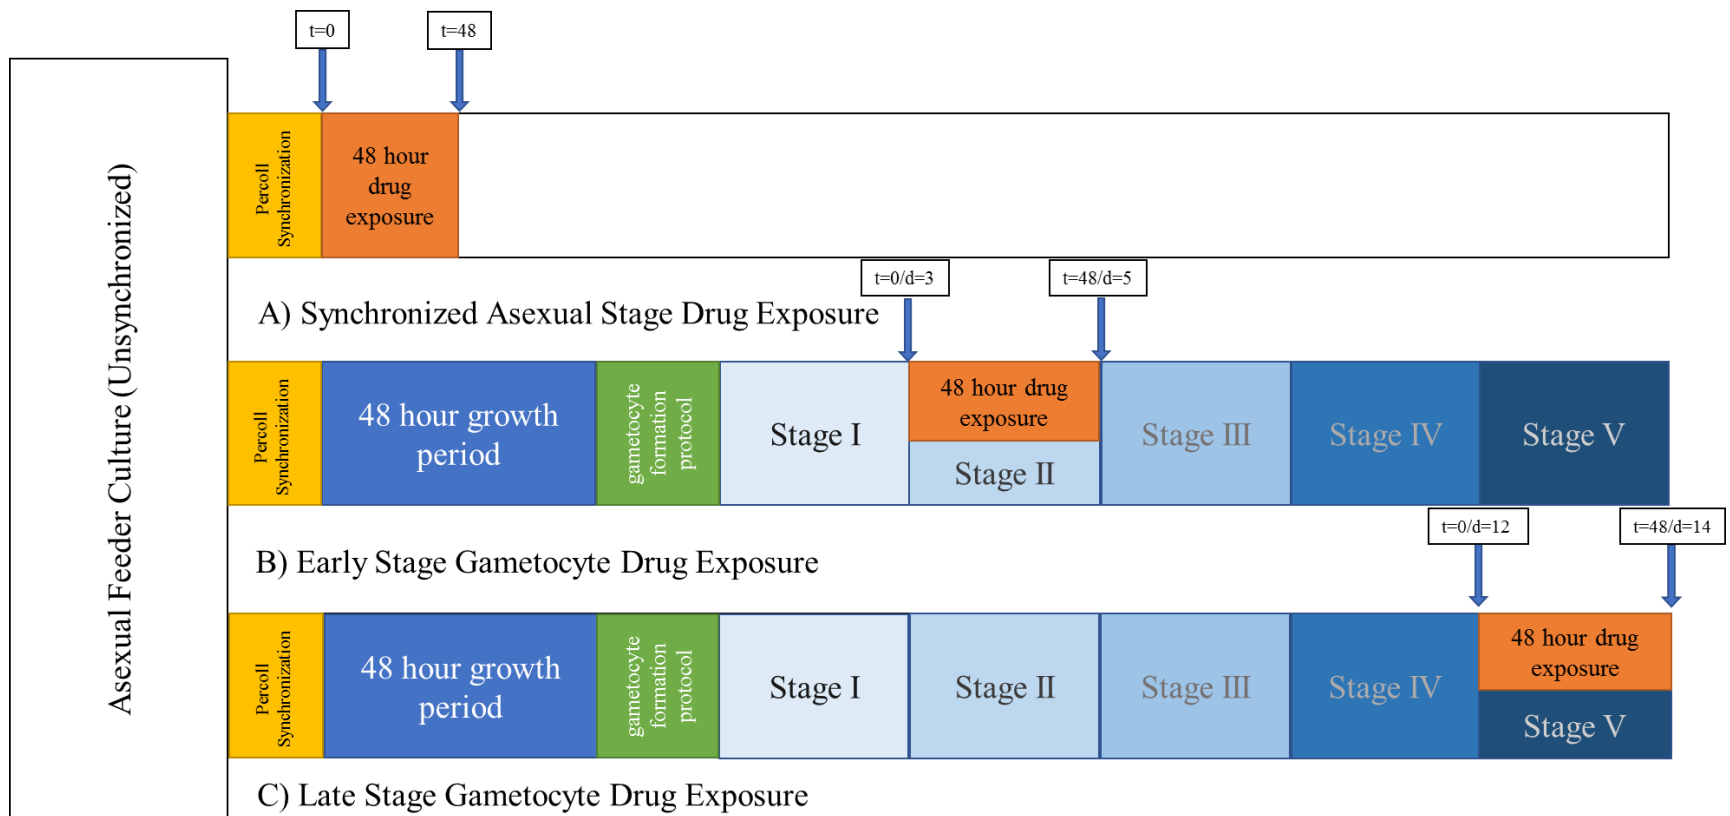

175  
 176 Figure 1. Experimental designs for each of the three assays used in this study. A) Timeline of asexual stage killing assay. B) Timeline  
 177 of early stage gametocyte elimination assay. C) Timeline of late stage gametocyte elimination assay. Boxes with arrows indicate when  
 178 samples were taken for RNA and or microscopy analysis.

179

180  
181

**Table 1. Genes, primers, and probes used in this study.**

| Gene     | Accession      | cDNA Synthesis Primer                       | RT-qPCR Primers                            |                                      | RT-qPCR probe                                |
|----------|----------------|---------------------------------------------|--------------------------------------------|--------------------------------------|----------------------------------------------|
|          |                |                                             | Forward                                    | Reverse                              |                                              |
| ASL      | XM_001349541.1 | 5'-<br>CCAATTTTGATTG<br>AGTTGTTCA-3'        | 5'-<br>GTGAGATTTCAG<br>ATACATTGGC-3'       | 5'-<br>GGATTTACTTTAT<br>GTGGCATGG-3' | 5'-<br>ACATTGATCGATTTAT<br>CTGTTGATATGTGG-3' |
| Pfs25    | AF154117.1     | 5'-<br>TTTAATGAGCATT<br>TGGTTTCTCCAT-<br>3' | 5'-<br>TCTGAAATGTGA<br>CGAAAAGACTGT-<br>3' | 5'-<br>AGCGTATGAAAC<br>GGGATTTCC-3'  | 5'-<br>ATAAACCATGTGGAG<br>ATTT-3'            |
| PfGE XP5 | XM_001352194.1 | 5'-<br>CCATACAACATA<br>TTATGCATCTTC-<br>3'  | 5'-<br>TTCTTGTTTCGAGA<br>TTATCCC-3'        | 5'-<br>AGTCTACTAATT<br>CAGACAGC-3'   | 5'-<br>TGTAATGTAGTAGAAG<br>GTACCATTGGTCA-3'  |

182  
183  
184  
185  
186

### Reagents and other materials

All reagents were from Sigma-Aldrich unless otherwise already specified.

### Statistical analysis

Descriptive statistics of RT-qPCR were calculated using Excel. RT-qPCR data were analyzed using Excel and the Pfaffl method for determining relative gene expression (Pfaffl, 2001). Excel was also used for descriptive statistics on microscopy data. Data and statistical tests of RT-qPCR and microscopy data were analyzed using GraphPad Prism version 7.03. Normality of each dataset was determined using the Shapiro-Wilk normality test. Appropriate parametric or non-parametric tests were applied to the data sets based on the targeted comparison. Two-tailed paired *t*-test (or nonparametric equivalent) was used to compare time points within treatment conditions, whereas one-way ANOVA (or nonparametric equivalent) was used to compare between treatment conditions at a defined time point.

197

### Results

198  
199

#### *In vitro* assays show asexual stage elimination by *Artemisia* tea infusions

Prior to drug treatment, synchronized asexual cultures at 1% parasitemia consisted of approximately 72% trophozoites with no significant differences in culture composition between each treatment group (Figure 2).

203

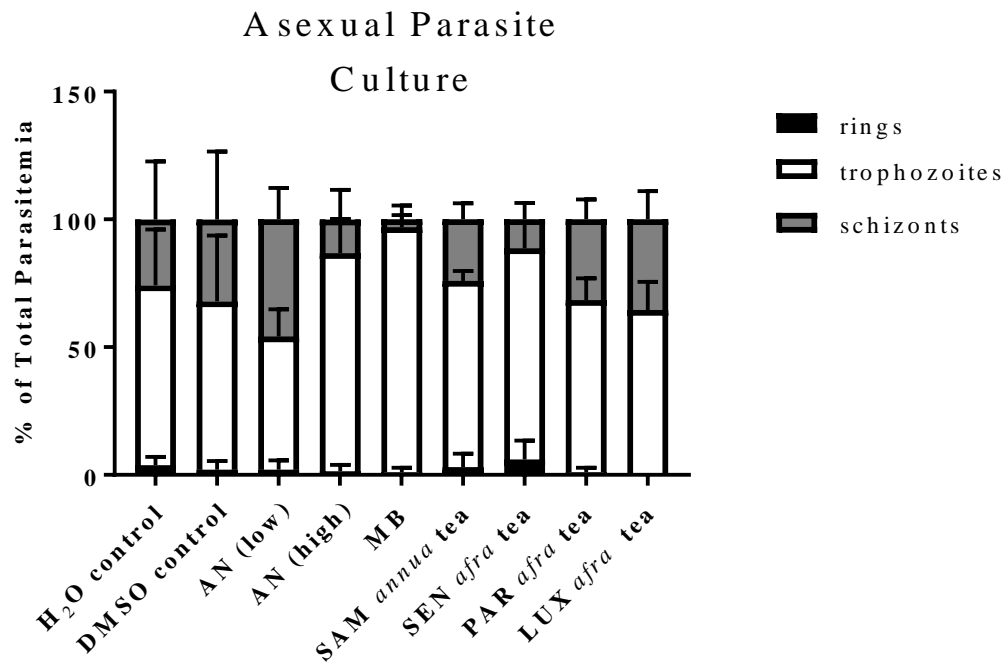

204  
205 Figure 2. Asexual culture composition prior to drug treatment. Percent parasitemia of each  
206 asexual parasite stage was normalized to total parasitemia to determine proportions of life stages  
207 in each culture prior to drug treatment. AN, artemisinin; MB, methylene blue. Error bars =  $\pm$  SD;  
208  $n = 3$ . Kruskal-Wallis with Dunn's multiple comparisons test performed on each parasite stage  
209 data set.

210  
211 Thin blood smears were taken immediately after addition of drug and 48 hr after treatment.  
212 Asexual parasitemia increased in the H<sub>2</sub>O and DMSO-only controls over the 48 hr, showing  
213 uninhibited growth of asexual parasites during that time (Figure 3A). Parasitemia significantly  
214 decreased in the artemisinin and SAM *A. annua* and SEN *A. afra* infusion treatments, but not for  
215 the PAR and LUX *A. afra* tea infusion treatments (Figure 3A). Although SEN *A. afra* tea  
216 infusion yielded a significant level of inhibitory activity when compared to the H<sub>2</sub>O control at 48  
217 hr ( $p=0.006$ ), the inhibition was not as strong as that observed for the SAM *A. annua* tea infusion  
218 treatment ( $p<0.001$ ) (Figure 3A). While both PAR and LUX *A. afra* tea infusions showed  
219 apparently similar growth inhibition to the SEN *afra* tea infusion, the results were not quite  
220 significant ( $p = 0.085$  and  $0.066$ , respectively). When the three *A. afra* cultivar tea infusions were  
221 compared to the SAM *A. annua* infusion, none of the *A. afra* infusions was significantly different  
222 (Figure 3B). This suggested that the three *A. afra* cultivar infusions have some inhibitory activity  
223 against *P. falciparum* parasites, but on a DW basis they were not as effective as SAM *A. annua*  
224 tea infusions. With confirmation that the experimental system was active against the asexual  
225 stage of *P. falciparum* parasites, we next determined how these two *Artemisia* tea infusions  
226 affected both early and late stage gametocytes.

227  
228



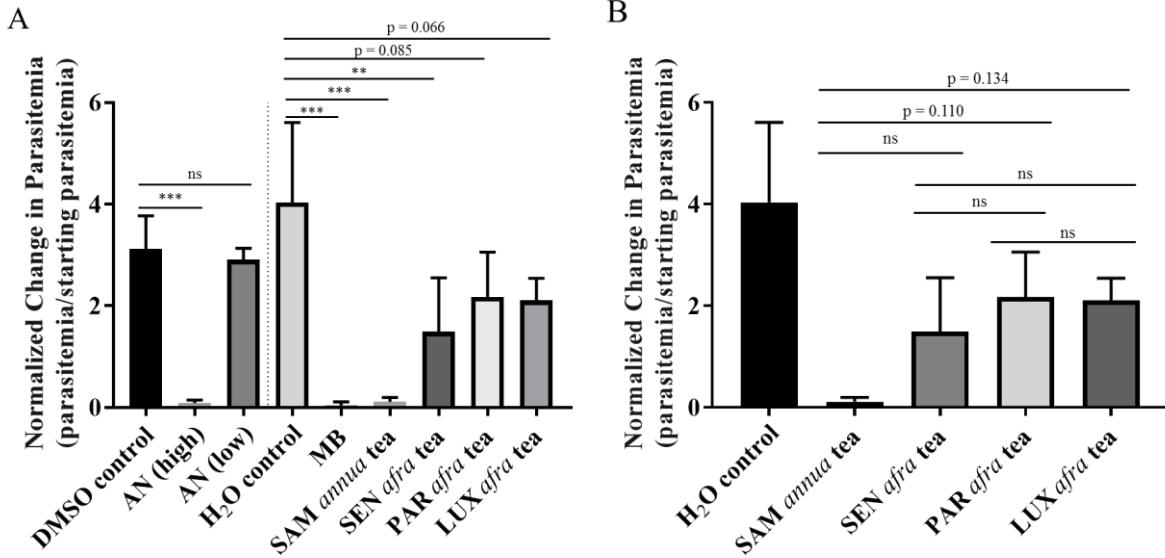

229  
230  
231 Figure 3. Microscopic determination of asexual parasitemia before and after drug treatment. A).  
232 Comparison of parasitemia after 48-hr treatment. B). Comparison of parasitemia after treatment  
233 with different *Artemisia spp.* tea infusions. Error bars,  $\pm$ SD;  $n = 3$ , one-way ANOVA with  
234 Tukey's multiple comparisons test, ns, not significant ( $p > 0.05$ ), \*\* =  $p \leq 0.01$ , \*\*\* =  $p \leq 0.001$ .  
235 AN, artemisinin; MB, methylene blue.

236  
237  
238 **Microscopically, *Artemisia* tea infusions eliminated *P. falciparum* gametocytes.**  
239 *Artemisia* tea infusions were tested separately against early and late stage gametocytes. Stage III  
240 gametocytes are the earliest gametocyte stage that can be microscopically identified, so they  
241 were used as a proxy for the presence of stage I-III gametocytes. Prior to treatment, 55% of  
242 gametocytes counted were stage III gametocytes, with no significant differences between the  
243 individual cultures (Figure 4A).

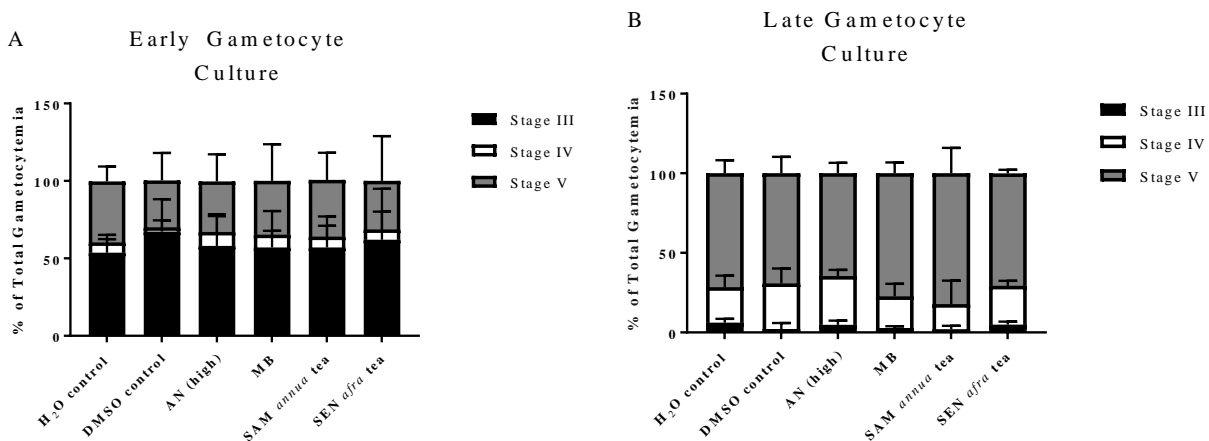

244  
245 Figure 4. Gametocyte culture composition prior to drug treatment. A) Population composition of  
246 early gametocyte culture. B) Population composition of late gametocyte culture. Both culture

247 compositions were determined by light microscopy. Percent gametocytemia of each gametocyte  
248 stage was normalized to total gametocytemia to determine proportions of life stages in each  
249 culture prior to drug treatment. AN, artemisinin; MB, methylene blue. Error bars =  $\pm$  SD;  $n = 3$ .  
250 Kruskal-Wallis with Dunn's multiple comparisons test performed on each parasite stage data set  
251 for late gametocyte culture, one-way ANOVA with Tukey's multiple comparisons test  
252 performed on each parasite stage data set for early gametocyte culture.

253

254 After 48 hr treatment, stage III gametocytemia decreased significantly in the artemisinin and  
255 SAM *A. annua* tea infusion treatment groups, but there was no reduction in the SEN *A. afra* tea  
256 treatment group (Figure 5A).

257

258 Prior to treatment, gametocyte cultures consisted of 73% healthy stage V gametocytes, with no  
259 significant difference between planned treatment conditions (Figure 4B). After 48 hr there were  
260 slight decreases in healthy stage V gametocytes after treatment with MB, and SAM *A. annua* and  
261 *A. afra* tea infusions ( $p = 0.082$ ,  $p = 0.109$ , and  $p = 0.607$ , respectively), but all were insignificant  
262 compared to water controls (Figure 5B). These results were likely due to low overall gametocyte  
263 populations.

264

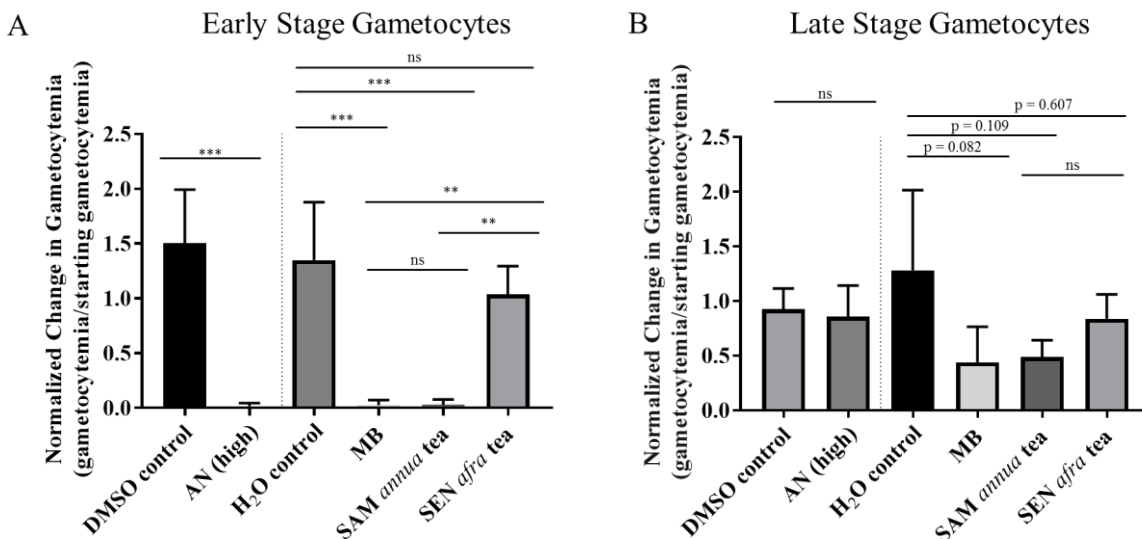

265

266

267 Figure 5. Healthy gametocytemia after 48-hour drug treatment as determined by light  
268 microscopy. A) Comparison of healthy stage III gametocytemia after 48-hr treatment. B)  
269 Comparison of healthy stage V gametocytemia after 48-hr treatment. Error bars,  $\pm$  SD,  $n = 3$ ,  
270 one-way ANOVA with Tukey's multiple comparisons test; ns, not significant ( $p > 0.05$ ), \*\* =  
271  $p \leq 0.01$ , \*\*\* =  $p \leq 0.001$ .

272

### 273 Gametocyte morphology post-treatment reveals tractable and distinct types of damage.

274 Besides counting gametocytes in cultures, the morphology of each gametocyte was scored to  
275 assess the overall health of that individual gametocyte. Healthy stage V gametocytes have a  
276 distinct, sausage-like shape with smooth, intact, and rounded edges; they appear plump (Table

277 2). Gametocytes were deemed unhealthy if they appeared emaciated, had bent or jagged edges,  
 278 had abnormal bulging, or were lysed open (Table 2). Although this analysis depends on the  
 279 assumption that only viable gametocytes can maintain a normal morphology, it provides  
 280 additional information regarding how different treatments affected late stage gametocyte  
 281 morphology. These damage data are summarized in Table 2 with representative images of  
 282 observed morphologies illustrated along the top of Table 2. Although no significant differences  
 283 could be found between treatments, there was generally more damage seen after 48 hr of  
 284 treatment with MB and SAM *A. annua* tea infusions than with SEN *A. afra* tea infusions (Table  
 285 2).

286

### 287 Artemisinin-containing treatments alter expression levels of gametocyte-specific genes

288 To probe more in depth, two different gametocyte-specific genes were measured using RT-  
 289 qPCR, *PfGEXP5* and *Pfs25*. In early stage gametocytes, *PfGEXP5* expression was significantly  
 290 reduced in SAM *A. annua* tea infusion treated cultures, and similar to the significant reduction  
 291 observed in the pure artemisinin treated cultures. No effect was seen in the SEN *A. afra* treated  
 292 cultures, suggesting that artemisinin content was a major driver of this effect (Figure 6A).

293

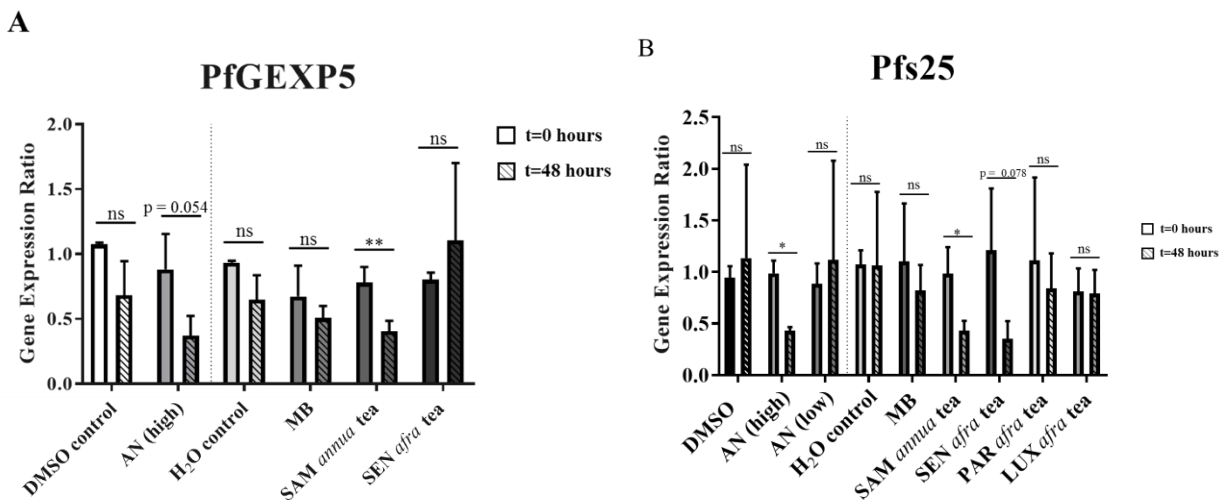

294

295

296 Figure 6. Quantification of gametocyte gene expression ratios via RT-qPCR in early and late  
 297 stage gametocytes. A) *PfGEXP5* gene expression ratios before and after 48-hr treatment in early  
 298 stage gametocytes. B) *Pfs25* gene expression ratios before and after 48-hr drug treatment in late  
 299 stage gametocytes. Error bars,  $\pm$  SD,  $n=3$ , two-tailed paired  $t$ -test (except for H<sub>2</sub>O control in B  
 300 analyzed by Wilcoxon test), ns, not significant ( $p>0.05$ ),  $*$  =  $p\leq 0.05$ .  $**$  =  $p\leq 0.01$ .

301

302

303 A similar effect was seen in late stage gametocytes for *Pfs25*. There were significant reductions  
 304 in expression in cultures treated with pure artemisinin (7.78 $\mu$ M, but not seen at 0.019  $\mu$ M) and  
 305 SAM *A. annua* tea infusion treatment groups. There was also a nearly significant ( $p=0.078$ )  
 306 reduction for the SEN *A. afra* tea infusion treatment condition (Figure 6b). Interestingly, despite  
 307 MB's gametocytocidal activity seen in the microscopy results, MB did not reduce the expression

308 of either gametocyte-specific gene tested here. Taken together, these results suggest that there  
309 may be an artemisinin-specific effect on these two gametocyte-specific genes.

Table 2. Morphological aberrations among gametocytes before and after drug treatment.

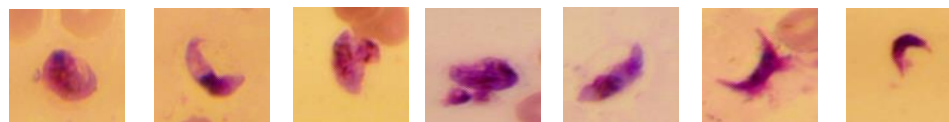

| Treatment                | Time (hr) | Total Gametocytes <sub>a</sub> | # Healthy Gametocytes | # Unhealthy Gametocytes | % Abnormal Morphology <sub>b,c</sub> | % Pinched Edges <sub>b,c</sub> | % Blebbed Edges <sub>b,c</sub> | % Bent <sub>b,c</sub> | % Jagged Edges <sub>b,c</sub> | % Lysed <sub>b,c</sub> | % Emaciated <sub>b,c</sub> |
|--------------------------|-----------|--------------------------------|-----------------------|-------------------------|--------------------------------------|--------------------------------|--------------------------------|-----------------------|-------------------------------|------------------------|----------------------------|
| H <sub>2</sub> O control | 0         | 82                             | 53                    | 29                      | 33.7                                 | 8.3                            | 43.9                           | 21.8                  | 12.5                          | 15.1                   | 2.6                        |
|                          | 48        | 102                            | 63                    | 39                      | 22.7                                 | 28.7                           | 40.3                           | 29.7                  | 4.0                           | 16.7                   | 7.3                        |
| DMSO control             | 0         | 86                             | 63                    | 23                      | 34.2                                 | 10.0                           | 53.3                           | 22.5                  | 6.7                           | 7.5                    | 6.7                        |
|                          | 48        | 104                            | 62                    | 42                      | 26.9                                 | 19.7                           | 33.7                           | 21.0                  | 6.1                           | 17.3                   | 9.1                        |
| Artemisinin (AN)         | 0         | 58                             | 44                    | 14                      | 22.5                                 | 12.5                           | 55.0                           | 27.5                  | 12.5                          | 5.0                    | 0.0                        |
|                          | 48        | 82                             | 45                    | 37                      | 17.4                                 | 9.1                            | 46.6                           | 8.0                   | 7.3                           | 20.2                   | 14.3                       |
| Methylene blue (MB)      | 0         | 54                             | 41                    | 13                      | 9.1                                  | 0.0                            | 61.4                           | 4.5                   | 29.5                          | 4.5                    | 0.0                        |
|                          | 48        | 97                             | 39                    | 58                      | 46.1                                 | 12.1                           | 47.3                           | 20.1                  | 14.4                          | 31.5                   | 40.2                       |
| SAM A. <i>annua</i> tea  | 0         | 97                             | 60                    | 37                      | 33.4                                 | 3.8                            | 65.9                           | 13.3                  | 8.3                           | 20.2                   | 1.8                        |
|                          | 48        | 102                            | 44                    | 58                      | 49.7                                 | 12.2                           | 40.1                           | 18.4                  | 5.9                           | 27.7                   | 11.5                       |
| SEN A. <i>afra</i> tea   | 0         | 78                             | 50                    | 28                      | 10.6                                 | 18.2                           | 37.2                           | 26.1                  | 12.3                          | 25.0                   | 3.9                        |
|                          | 48        | 79                             | 55                    | 24                      | 49.9                                 | 13.2                           | 67.8                           | 28.5                  | 8.5                           | 8.3                    | 19.9                       |

a: Sum of stage V gametocytes counted across three replicates for the time point and experimental condition.

b: Reflects percentage of abnormal gametocytes with specific deformity in that time point and treatment condition.

c: Total percentages may not add up to 100% because each percentage is the average of three replicates, and one single gametocyte may possess multiple forms of damage.

310

311

## 312 Discussion

313 To our knowledge, this is the first study that measured the *in vitro* antiparasitic ability of  
314 *Artemisia* tea infusions against the sexual, gametocyte stages of *P. falciparum*. Several  
315 interesting and relevant patterns have emerged. First, there appears to be a correlation between  
316 artemisinin concentration and antiparasitic efficacy of the tea infusions *in vitro*. Duffy and  
317 Avery (2013) used parasite strain NF54 to determine the IC<sub>50</sub> of pure artemisinin against early  
318 and late stage gametocytes, and the IC<sub>50</sub>s were 12 nM and 5 nM, respectively. Although tea  
319 infusions contain other phytochemicals besides artemisinin, they still behaved in a dose-  
320 dependent manner. According to the published IC<sub>50</sub>s, both SAM *A. annua* and SEN *A. afra* tea  
321 infusions delivered enough artemisinin to kill late stage gametocytes, but only SAM *A. annua*  
322 delivered enough artemisinin to eliminate early stage gametocytes, results consistent with the  
323 published IC<sub>50</sub> (Duffy and Avery, 2013). For early stage gametocytes the results of this study  
324 were fully consistent with the Duffy and Avery (2013) results; there was a significant decrease in  
325 gametocytemia when exposed to SAM *A. annua* tea infusions, but not SEN infusions. For late  
326 stage gametocytes, both SAM and SEN had anti-gametocyte activity, but not as powerful as  
327 anticipated. This was attributed to the fact that in the late stage experiments the gametocyte  
328 populations were lower than those measured at the early stages closer to NAG induction. Results  
329 of this study, thus, were generally consistent with the results of Duffy and Avery (2013) and  
330 showed better efficacy for the SAM vs. the SEN infusions. Taken together, these suggested that  
331 artemisinin was the major driver of gametocytocidal activity for these *Artemisia* tea infusions.

332  
333 Although at first glance these results appear inconsistent with the clinical trial data of Munyangi  
334 et al (2019) that showed both *A. afra* and *A. annua* tea infusions eliminated gametocytes, they  
335 are consistent when considering the total delivered amount of artemisinin. In this study 7.78 µM  
336 artemisinin was delivered from the SAM *A. annua* tea, whereas only 19 nM artemisinin was  
337 delivered from the SEN *A. afra* tea. However, in the clinical trial, each patient received a  
338 minimum of 520 nM artemisinin from the *A. afra* tea infusion per dose, and the *A. annua* tea  
339 infusion delivered over 45 times the amount delivered in the *A. afra* tea infusion (Munyangi *et*  
340 *al.*, 2019). The clinical trial showed that *A. afra* tea infusion was an equally viable treatment  
341 option against *P. falciparum* malaria despite its negligible artemisinin content. The *in vitro*  
342 results of this study showed that artemisinin content was the main factor in assessing the *in vitro*  
343 gametocidal efficacy of these teas.

344  
345 Along with microscopically quantifying gametocytemia after treatment, we were also able to  
346 score the health of gametocytes via morphological analysis. Although we were unable to  
347 determine any significant differences between treatment groups after 48 hr treatment, in general  
348 there was a higher percentage of damaged gametocytes in cultures treated with MB or SAM *A.*  
349 *annua* tea infusion. The results obtained by using MB were consistent with Wadi et al. (2018)  
350 who showed that MB is effective at eliminating both early and late stage gametocytes, with an  
351 IC<sub>50</sub> of 424 nM and 106 nM, respectively. They also showed that MB induced distinct  
352 morphological damage to late stage gametocytes, including membrane deformities or shrinkage  
353 (Wadi *et al.*, 2018). After 48 hr treatment with 10 µM MB, we also observed substantial  
354 morphological damage in the form of various membrane deformities. This suggests that the

355 morphological damage observed in the SAM *A. annua* tea infusion may indicate that the  
356 additional phytochemicals present in the infusion contributed to the overall antiparasitic effect,  
357 particularly because similar levels of damage were not seen in the artemisinin-only treatment  
358 condition.

359  
360 We were also interested in exploring what was occurring on a molecular level when gametocytes  
361 were treated with *Artemisia spp.* tea infusions. To address this question, we looked at two  
362 gametocyte-specific genes. *PfGEXP5* is the earliest known gametocyte-specific gene to be  
363 expressed (Tibúrcio *et al.*, 2015), and *Pfs25* is a stage V gametocyte marker gene expressed  
364 predominantly in late stage gametocytes. *Pfs25* function is well characterized as an ookinete  
365 surface antigen that is translationally repressed in the late stage female gametocyte (Kaslow *et*  
366 *al.*, 1988). *PfGEXP5* function is currently unknown, although it is expressed about 14 hours after  
367 a sexually committed merozoite invades an erythrocyte, and that it is likely exported into the host  
368 cell cytoplasm to perform its function (Tibúrcio *et al.*, 2015).

369  
370 Here we showed that *PfGEXP5* and *Pfs25* expression levels decreased when there were  
371 appreciable amounts of artemisinin in the treatments, but not so in the MB treatment.  
372 Nevertheless, MB significantly reduced microscopic counts of gametocytes. This suggests that  
373 the gametocytocidal effects of each treatment was due to distinctly different mechanisms of  
374 action leading to different gametocyte-specific gene expression profiles. Although the  
375 mechanism of action for both artemisinin and MB are not fully elucidated, it is thought that MB  
376 is an oxidative stress inducer that specifically targets the cellular antioxidant protein glutathione  
377 reductase (Delves *et al.*, 2013; Mott *et al.*, 2015). Artemisinin likely has multiple mechanisms of  
378 action. When the molecule comes into contact with free heme in the parasite, the endoperoxide  
379 bridge is cleaved and reactive oxygen species (ROS) are released, causing damage to parasite  
380 proteins via alkylation (Medhi *et al.*, 2009; Delves *et al.*, 2013) The molecule itself can also bind  
381 directly to at least 124 different parasite proteins (Wang *et al.*, 2015). Since neither *Pfs25* nor  
382 *PfGEXP5* play a role in the oxidative stress response, it follows that neither of these genes are  
383 targets of MB. However, since artemisinin targets at least 124 proteins from all different cellular  
384 processes, it is possible that both *PfGEXP5* and *Pfs25* are direct targets of artemisinin.

385  
386 Although the functional importance of *PfGEXP5* has not yet been elucidated, *Pfs25* yields the  
387 ookinete surface antigen, and reducing the expression of this gene may have downstream effects  
388 in the female gamete. In fact, there is evidence that P25 is essential for ookinete survival in the  
389 mosquito midgut, as well as transformation into an oocyst (Tomas *et al.*, 2001). Further research is  
390 needed to understand the functional relevance of this decrease in expression of gametocyte-  
391 specific genes.

392  
393 In this study, we aimed to determine the antiparasitic effects of various *Artemisia* tea infusions  
394 on different stages of *P. falciparum* gametocytes. At the time of this report, there were at least  
395 seven other studies that tested *Artemisia* tea infusions against *P. falciparum in vitro* (Liu *et al.*,  
396 2010; de Donno *et al.*, 2012; Silva *et al.*, 2012; Mouton *et al.*, 2013; Omar *et al.*, 2013; Suberu *et*  
397 *al.*, 2013; Zime-Diawara *et al.*, 2015). However, all of these studies only looked at asexual

398 parasites. The asexual parasite data of this study aligns well with results published in those  
399 studies. Of the seven, two reported IC<sub>50</sub>s in nM, with an IC<sub>50</sub> of 2.9-7.6 nM (Suberu *et al.*, 2013;  
400 Zime-Diawara *et al.*, 2015). The SEN *A. afra* tea infusion delivered 19 nM artemisinin per dose,  
401 and the SAM *A. annua* tea infusion delivered about 400x that amount (7.6 μM). The minimum  
402 threshold of artemisinin for killing *P. falciparum* asexual parasites is reported at ~10 μg/L (0.035  
403 μM) (Alin and Bjorkman, 1994), so while the SAM infusion was >200 fold greater than the  
404 minimum artemisinin level, the SEN infusion had about half the artemisinin concentration  
405 required to kill asexual parasites and yet there was a significant decrease in parasitemia within 48  
406 hr. Despite having undetectable levels of artemisinin, *A. afra* PAR and LUX tea infusions also  
407 decreased asexual parasitemia comparable to that observed with SEN. Together these results  
408 suggest that there are other synergistic or antimalarial compounds present in these *Artemisia*  
409 cultivars that are providing this antiparasitic activity despite the absence of detectable  
410 artemisinin.

411  
412 Furthermore, when the antiparasitic efficacy of the low artemisinin control treatment is  
413 compared to the efficacy of SEN *A. afra* tea infusion, both of which delivered 19 nM  
414 artemisinin, there appeared to be a stronger effect due to the tea infusion than to the pure  
415 artemisinin (although it was not a significant difference). This is consistent with other reports  
416 where an IC<sub>50</sub> of AN delivered by *Artemisia* tea infusions against *in vitro* asexual *P. falciparum*  
417 parasites was 2.9-7.6 nM (Suberu *et al.*, 2013; Zime-Diawara *et al.*, 2015), whereas the IC<sub>50</sub> of  
418 pure artemisinin against *in vitro* asexual *P. falciparum* parasites was 42 nM (Duffy and Avery,  
419 2013). In contrast to the recent claim by Czechowski, et al. (2019), these results support the  
420 hypothesis that *Artemisia* tea infusions are antiparasitic and deliver additional phytochemicals  
421 that likely act either synergistically with artemisinin to enhance its antimalarial ability or possess  
422 their own antimalarial activity.

423

## 424 **Conclusions**

425 This study provides *in vitro* evidence that *Artemisia spp.* tea infusions had gametocytocidal  
426 activity against both early and late stage gametocytes, but with differential effects in gametocidal  
427 activity, in morphological aberrations, and in gene expression. *Artemisia* tea infusions that  
428 contain little to no artemisinin were also antiparasitic, but less so than cultivars containing  
429 artemisinin. *Artemisia* tea infusions are also effective against the asexual stages of the parasite  
430 but become less effective as the artemisinin content of a specific cultivar declines. No *in vitro*  
431 study using any extract can replicate *in vivo* studies in which there are also likely host  
432 interactions with the therapeutic. Nevertheless, this study is consistent with the prior human  
433 malaria clinical trials showing that *Artemisia* tea infusions are gametocidal. Further work is  
434 needed to determine if the tea infusions also prevent transmission to the mosquito vector. If that  
435 occurs, then *Artemisia spp.*, especially those containing reasonable amounts of artemisinin  
436 (~1%), could provide a more cost-effective means to thwart this deadly disease.

437

438

439

440



441  
442  
443  
444  
445  
446  
447  
448  
449  
450  
451  
452  
453  
454  
455  
456  
457  
458  
459  
460  
461  
462  
463  
464  
465  
466  
467  
468  
469  
470  
471  
472  
473  
474  
475  
476  
477  
478  
479  
480  
481  
482  
483

### **Acknowledgements**

Thank you to Dr. Ashley Vaughan (Seattle Children’s Research Institute) for the NF54 parasite line, Dr. Lisa Checkley (University of Notre Dame) for assistance with troubleshooting parasite synchronization, to Dr. Ann Stewart’s lab, Uniformed Services University of Health Sciences, Bethesda, MD for training DS in efficiently extracting parasite RNA from blood samples, and to Dr. Melissa Towler for plant sample analyses and parasite counting. SEN, PAR, and LUX were from Dr. Guy Mergei, University of Liege, Belgium, Dr. Lucille Cornet-Vernet from La Maison d’Artemisia, France, and Dr. Pierre Lutgen, Luxemborg, respectively. This work was funded by the Ararat fund for Artemisinin Research at WPI. Phytochemical analysis of *Artemisia* samples was supported in part by The National Center for Complementary and Integrative Health, award number NIH-2R15AT008277-02. The content is solely the responsibility of the authors and does not necessarily represent the official views of the National Center for Complementary and Integrative Health or the National Institutes of Health.

### **Author contributions:**

DS designed experiments, conducted experiments, analyzed data, wrote manuscript. PW designed experiments, analyzed data, wrote manuscript.

484  
485  
486  
487  
488  
489  
490  
491  
492  
493  
494  
495  
496  
497  
498  
499  
500  
501  
502  
503  
504  
505  
506  
507  
508  
509  
510  
511  
512  
513  
514  
515  
516  
517  
518  
519  
520  
521

## References

- Alin, M. H. and Bjorkman, A.** (1994). Concentration and Time Dependency of Artemisinin Efficacy Against *Plasmodium falciparum* in Vitro. *The American Journal of Tropical Medicine and Hygiene* **50**, 771–776. doi: <https://doi.org/10.4269/ajtmh.1994.50.771>.
- Baker, D. A.** (2010). Malaria gametocytogenesis. *Molecular and Biochemical Parasitology* **172**, 57–65. doi: [10.1016/j.molbiopara.2010.03.019](https://doi.org/10.1016/j.molbiopara.2010.03.019).
- Beri, D., Balan, B. and Tatu, U.** (2018). Commit, hide and escape: The story of *Plasmodium* gametocytes. *Parasitology* **145**, 1772–1782. doi: [10.1017/S0031182018000926](https://doi.org/10.1017/S0031182018000926).
- Bousema, J. T., Schneider, P., Gouagna, L. C., Drakeley, C. J., Tostmann, A., Houben, R., Githure, J. I., Ord, R., Sutherland, C. J., Omar, S. A. and Sauerwein, R. W.** (2006). Moderate Effect of Artemisinin-Based Combination Therapy on Transmission of *Plasmodium falciparum*. *The Journal of Infectious Diseases* **193**, 1151–1159. doi: [10.1086/503051](https://doi.org/10.1086/503051).
- Czechowski, T., Rinaldi, M. A., Famodimu, M. T., Veelen, M. van, Larson, T. R., Winzer, T., Rathbone, D. A., Harvey, D., Horrocks, P. and Graham, I. A.** (2019). Flavonoid Versus Artemisinin Anti-malarial Activity in *Artemisia annua* Whole-Leaf Extracts. *Frontiers in Plant Science* **10**,. doi: [10.3389/fpls.2019.00984](https://doi.org/10.3389/fpls.2019.00984).
- de Donno, A., Grassi, T., Idolo, A., Guido, M., Papadia, P., Caccioppola, A., Villanova, L., Merendino, A., Bagordo, F. and Fanizzi, F. P.** (2012). First-time comparison of the in vitro antimalarial activity of *Artemisia annua* herbal tea and artemisinin. *Transactions of the Royal Society of Tropical Medicine and Hygiene* **106**, 696–700. doi: [10.1016/j.trstmh.2012.07.008](https://doi.org/10.1016/j.trstmh.2012.07.008).
- Delves, M. J., Ruecker, A., Straschil, U., Lelièvre, J., Marques, S., López-Barragán, M. J., Herreros, E. and Sinden, R. E.** (2013). Male and female *Plasmodium falciparum* mature gametocytes show different responses to antimalarial drugs. *Antimicrobial Agents and Chemotherapy* **57**, 3268–3274. doi: [10.1128/AAC.00325-13](https://doi.org/10.1128/AAC.00325-13).
- Duffy, S. and Avery, V. M.** (2013). Identification of inhibitors of *Plasmodium falciparum* gametocyte development. *Malaria Journal* **12**,. doi: [10.1186/1475-2875-12-408](https://doi.org/10.1186/1475-2875-12-408).
- Gomes, C., Boareto, A. C. and Dalsenter, P. R.** (2016). Clinical and non-clinical safety of artemisinin derivatives in pregnancy. *Reproductive Toxicology* **65**, 194–203. doi: [10.1016/j.reprotox.2016.08.003](https://doi.org/10.1016/j.reprotox.2016.08.003).
- Kaslow, D. C., Quakyi, I. A., Syin, C., Raum, M. G., Keister, D. B., Coligan, J. E., McCutchan, T. F. and Miller, L. H.** (1988). A vaccine candidate from the sexual stage of human malaria that contains EGF-like domains. *Nature* **333**, 74–76. doi: [10.1038/333074a0](https://doi.org/10.1038/333074a0).
- Liu, N. Q., Cao, M., Frédérick, M., Choi, Y. H., Verpoorte, R. and van der Kooy, F.** (2010). Metabolomic investigation of the ethnopharmacological use of *Artemisia afra* with NMR spectroscopy and multivariate data analysis. *Journal of Ethnopharmacology* **128**, 230–235. doi: [10.1016/j.jep.2010.01.020](https://doi.org/10.1016/j.jep.2010.01.020).

- 522 **Martini, M., Zhang, T., Williams, J., Towler, M., Abramovitch, R., Weathers, P. and Shell, S. (2020).**  
523 Artemisia annua and Artemisia afra extracts exhibit strong bactericidal activity against  
524 Mycobacterium tuberculosis. *Journal of Ethnopharmacology*.
- 525 **Medhi, B., Patyar, S., Rao, R. S., DS, P. B. and Prakash, A. (2009).** Pharmacokinetic and Toxicological  
526 Profile of Artemisinin Compounds : An Update. *Pharmacology* **84**, 323–332. doi:  
527 10.1159/000252658.
- 528 **Moll, K., Kaneko, A., Scherf, A. and Wahlgren, M. (2013).** *Methods in Malaria Research*. doi:  
529 10.1007/s00436-008-0981-9.
- 530 **Mott, B. T., Eastman, R. T., Guha, R., Sherlach, K. S., Siriwardana, A., Shinn, P., McKnight, C., Michael,**  
531 **S., Lacerda-Queiroz, N., Patel, P. R., Khine, P., Sun, H., Kasbekar, M., Aghdam, N., Fontaine, S. D.,**  
532 **Liu, D., Mierzwa, T., Mathews-Griner, L. A., Ferrer, M., Renslo, A. R., Inglese, J., Yuan, J., Roepe,**  
533 **P. D., Su, X. Z. and Thomas, C. J. (2015).** High-throughput matrix screening identifies synergistic  
534 and antagonistic antimalarial drug combinations. *Scientific Reports* **5**,. doi: 10.1038/srep13891.
- 535 **Mouton, J., Jansen, O., Frédéricich, M. and van der Kooy, F. (2013).** Is artemisinin the only antiplasmodial  
536 compound in the artemisia annua tea infusion? An in vitro study. *Planta Medica* **79**, 468–470. doi:  
537 10.1055/s-0032-1328324.
- 538 **Munyangi, J., Cornet-Vernet, L., Idumbo, M., Lu, C., Lutgen, P., Perronne, C., Ngombe, N., Bianga, J.,**  
539 **Mupenda, B., Lalukala, P., Mergeai, G., Mumba, D., Towler, M. and Weathers, P. (2019).**  
540 Artemisia annua and Artemisia afra tea infusions vs. artesunate-amodiaquine (ASAQ) in treating  
541 Plasmodium falciparum malaria in a large scale, double blind, randomized clinical trial.  
542 *Phytomedicine* **57**, 49–56. doi: 10.1016/J.PHYMED.2018.12.002.
- 543 **Omar, G. P. E. hadji, Mouhamadou, D., Bineta, D. A., Sadikh, B. A., Mare, D. D., Ambroise, A., Ndiaye,**  
544 **A. A., Therese, D., Lutgen, P., Souleymane, M. and Ousmane, S. (2013).** Tea Artemisia annua  
545 inhibits Plasmodium falciparum isolates collected in Pikine, Senegal. *African Journal of*  
546 *Biochemistry Research* **7**, 107–113. doi: 10.5897/AJBR12.022.
- 547 **Pfaffl, M. W. (2001).** A new mathematical model for relative quantification in real-time RT-PCR. *Nucleic*  
548 *Acids Research* **29**,. doi: 10.1016/S0043-1354(98)00516-8.
- 549 **Phillips, M. A., Burrows, J. N., Manyando, C., van Huijsduijnen, R. H., van Voorhis, W. C. and Wells, T.**  
550 **N. C. (2017).** Malaria. *Nature Reviews Disease Primers* **3**,. doi: 10.1038/nrdp.2017.50.
- 551 **Saliba, K. S. and Jacobs-Lorena, M. (2013).** Production of Plasmodium falciparum Gametocytes In Vitro.  
552 *Methods Mol Biol.* **923**, 17–25. doi: 10.1007/978-1-62703-026-7.
- 553 **Sanofi-Aventis (2017).** Primaquine. *Federal Drug Administration*.
- 554 **Silva, L. F. R. e, de Magalhães, P. M., Costa, M. R. F., Alecrim, M. das G. C., Chaves, F. C. M., Hidalgo, A.**  
555 **de F., Pohlit, A. M. and Vieira, P. P. R. (2012).** In vitro susceptibility of Plasmodium falciparum  
556 Welch field isolates to infusions prepared from Artemisia annua L. cultivated in the Brazilian  
557 Amazon. *Memorias do Instituto Oswaldo Cruz* **107**, 859–866. doi: 10.1590/S0074-  
558 02762012000700004.

- 559 **Sinden, R. E. and Smalley, M. E.** (1979). Gametocytogenesis of *Plasmodium falciparum* in vitro: the cell-  
560 cycle. *Parasitology* **79**, 277–296. doi: DOI: 10.1017/S003118200005335X.
- 561 **Suberu, J. O., Gorka, A. P., Jacobs, L., Roepe, P. D., Sullivan, N., Barker, G. C. and Lapkin, A. A.** (2013).  
562 Anti-plasmodial polyvalent interactions in *Artemisia annua* L. aqueous extract - Possible synergistic  
563 and resistance mechanisms. *PLoS ONE* **8**,. doi: 10.1371/journal.pone.0080790.
- 564 **The malERA Consultative Group on Drugs** (2011). A research agenda for malaria eradication: Drugs.  
565 *PLoS Medicine* **8**,. doi: 10.1371/journal.pmed.1000402.
- 566 **Tibúrcio, M., Dixon, M. W. A., Looker, O., Younis, S. Y., Tilley, L. and Alano, P.** (2015). Specific  
567 expression and export of the *Plasmodium falciparum* Gametocyte EXported Protein-5 marks the  
568 gametocyte ring stage. *Malaria Journal* **14**,. doi: 10.1186/s12936-015-0853-6.
- 569 **Tomas, A. M., Margos, G., Dimopoulos, G., van Lin, L. H. M., de Koning-Ward, T. F., Sinha, R., Lupetti,**  
570 **P., Beetsma, A. L., Rodriguez, M. C., Karras, M., Hager, A., Mendoza, J., Butcher, G. A., Kafatos, F.,**  
571 **Janse, C. J., Waters, A. P. and Sinden, R. E.** (2001). P25 and P28 proteins of the malaria ookinete  
572 surface have multiple and partially redundant functions. *EMBO Journal* **20**, 3975–3983. doi:  
573 10.1093/emboj/20.15.3975.
- 574 **Wadi, I., Pillai, C. R., Anvikar, A. R., Sinha, A., Nath, M. and Valecha, N.** (2018). Methylene blue induced  
575 morphological deformations in *Plasmodium falciparum* gametocytes: Implications for transmission-  
576 blocking. *Malaria Journal* **17**,. doi: 10.1186/s12936-017-2153-9.
- 577 **Wang, J., Zhang, C. J., Chia, W. N., Loh, C. C. Y., Li, Z., Lee, Y. M., He, Y., Yuan, L. X., Lim, T. K., Liu, M.,**  
578 **Liew, C. X., Lee, Y. Q., Zhang, J., Lu, N., Lim, C. T., Hua, Z. C., Liu, B., Shen, H. M., Tan, K. S. W. and**  
579 **Lin, Q.** (2015). Haem-activated promiscuous targeting of artemisinin in *Plasmodium falciparum*.  
580 *Nature Communications* **6**,. doi: 10.1038/ncomms10111.
- 581 **World Health Organization** (2019). *World Malaria Report 2019*. Geneva.
- 582 **Young, J. A., Fivelman, Q. L., Blair, P. L., de la Vega, P., le Roch, K. G., Zhou, Y., Carucci, D. J., Baker, D.**  
583 **A. and Winzeler, E. A.** (2005). The *Plasmodium falciparum* sexual development transcriptome: A  
584 microarray analysis using ontology-based pattern identification. *Molecular and Biochemical*  
585 *Parasitology* **143**, 67–79. doi: 10.1016/j.molbiopara.2005.05.007.
- 586 **Zime-Diawara, H., Ganfon, H., Gbaguidi, F., Yemoa, A., Bero, J., Jansen, O., Evrard, B., Moudachirou,**  
587 **M., Frederich, M. and Quetin-Leclercq, J.** (2015). The antimalarial action of aqueous and hydro  
588 alcoholic extracts of *Artemisia annua* L. cultivated in Benin : In vitro and in vivo studies. *Journal of*  
589 *Chemical and Pharmaceutical Research* **7**, 817–823.
- 590  
591  
592  
593  
594  
595  
596  
597

598 **Figure Legends:**

599 Figure 1. Experimental designs for each of the three assays used in this study. A) Timeline of  
600 asexual stage killing assay. B) Timeline of early stage gametocyte elimination assay. C)  
601 Timeline of late stage gametocyte elimination assay. Boxes with arrows indicate when samples  
602 were taken for RNA and or microscopy analysis.

603 Figure 2. Asexual culture composition prior to drug treatment. Percent parasitemia of each  
604 asexual parasite stage was normalized to total parasitemia to determine proportions of life stages  
605 in each culture prior to drug treatment. AN, artemisinin; MB, methylene blue. Error bars =  $\pm$  SD;  
606  $n = 3$ . Kruskal-Wallis with Dunn's multiple comparisons test performed on each parasite stage  
607 data set.

608  
609 Figure 3. Microscopic determination of asexual parasitemia before and after drug treatment. A).  
610 Comparison of parasitemia after 48-hr treatment. B). Comparison of parasitemia after treatment  
611 with different *Artemisia* tea infusions. Error bars,  $\pm$ SD;  $n = 3$ , one-way ANOVA with Tukey's  
612 multiple comparisons test, ns, not significant ( $p > 0.05$ ), \*\* =  $p \leq 0.01$ , \*\*\* =  $p \leq 0.001$ . AN,  
613 artemisinin; MB, methylene blue.

614  
615 Figure 4. Gametocyte culture composition prior to drug treatment. A) Population composition of  
616 early gametocyte culture. B) Population composition of late gametocyte culture. Both culture  
617 compositions were determined by light microscopy. Percent gametocytemia of each gametocyte  
618 stage was normalized to total gametocytemia to determine proportions of life stages in each  
619 culture prior to drug treatment. AN, artemisinin; MB, methylene blue. Error bars =  $\pm$  SD;  $n = 3$ .  
620 Kruskal-Wallis with Dunn's multiple comparisons test performed on each parasite stage data set  
621 for late gametocyte culture, one-way ANOVA with Tukey's multiple comparisons test  
622 performed on each parasite stage data set for early gametocyte culture.

623  
624 Figure 5. Healthy gametocytemia after 48-hour drug treatment as determined by light  
625 microscopy. A) Comparison of healthy stage III gametocytemia after 48-hr treatment. B)  
626 Comparison of healthy stage V gametocytemia after 48-hr treatment. Error bars,  $\pm$  SD,  $n = 3$ ,  
627 one-way ANOVA with Tukey's multiple comparisons test; ns, not significant ( $p > 0.05$ ), \*\*=  
628  $p \leq 0.01$ , \*\*\* =  $p \leq 0.001$ .

629  
630 Figure 6. Quantification of gametocyte gene expression ratios via RT-qPCR in early and late  
631 stage gametocytes. A) *PfGEXP5* gene expression ratios before and after 48-hr treatment in early  
632 stage gametocytes. B) *Pfs25* gene expression ratios before and after 48-hr drug treatment in late  
633 stage gametocytes. Error bars,  $\pm$  SD,  $n = 3$ , two-tailed paired *t*-test (except for H<sub>2</sub>O control in B  
634 analyzed by Wilcoxon test), ns, not significant ( $p > 0.05$ ), \* =  $p \leq 0.05$ . \*\* =  $p \leq 0.01$ .

635  
636 **Table Legends:**

637 Table 1. Genes, primers, and probes used in this study.

638 Table 2. Morphological aberrations among gametocytes before and after drug treatment.  
639
